# Supplementary material
Source: publisher site journal article supplement (https://www.spandidos-publications.com/2704/downloadSupplementary)

Figure S1. Overexpression and knockdown of PUM2 in ovarian cancer cells. Transfection efficiency of PUM2 overexpression plasmid in SKOV3 and SKOV3/DDP cells was analyzed via (A) reverse transcription-quantitative PCR and (B) western blotting. Transfection efficiency of si-PUM2 in SKOV3 cells was analyzed via (C) reverse transcription-quantitative PCR and (D) western blotting. \* $P < 0.05$ . PUM2, pumillo RNA binding family member 2; si, small interfering RNA; NC, negative control; DDP, cisplatin.

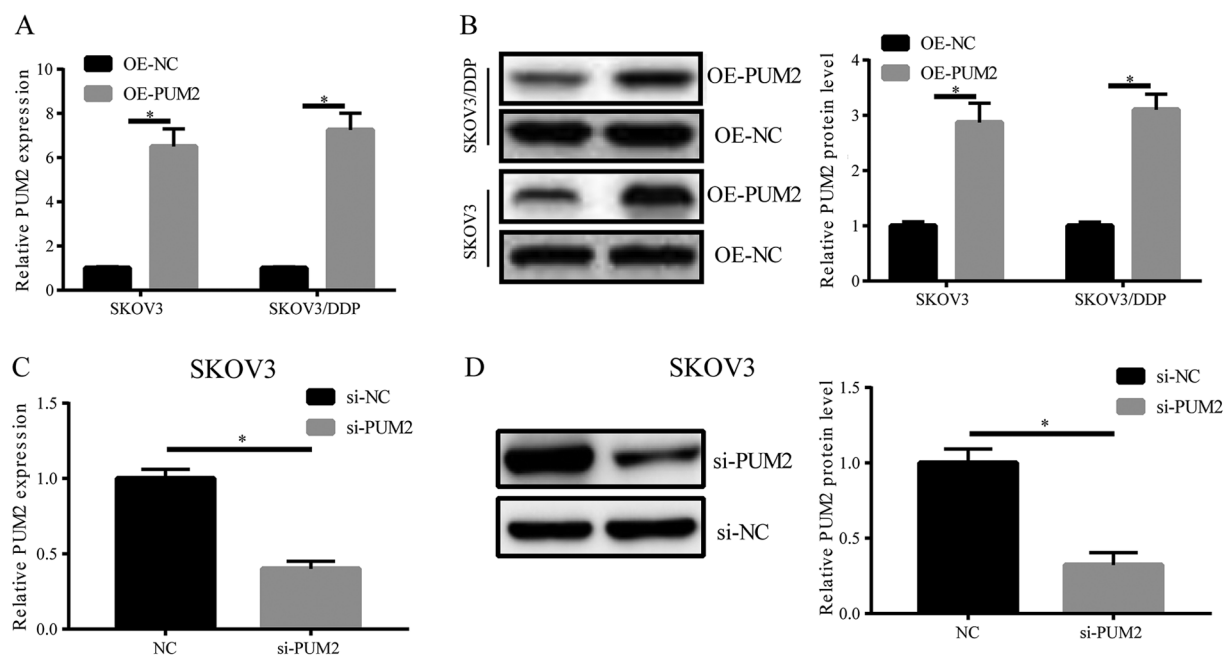

Supplement: Supplementary file 1 [file downloadSupplementary]
